# Supplementary material
Source: ML conference proceedings conference paper supplement (https://proceedings.neurips.cc/paper_files/paper/2016/hash/9c01802ddb981e6bcfbec0f0516b8e35-Abstract.html)
Supplement: Supplementary file [file 9c01802ddb981e6bcfbec0f0516b8e35-Supplemental.zip]

---

# Appendix for a scalable end-to-end Gaussian process adapter for time series classification

---

## A Gradients for GP approximation

### A.1 Gradients of the approximate posterior GP covariance-vector product

Throughout we denote the independent noise variance  $\sigma^2$  as  $\rho$  for clarity. Let  $\tilde{\Sigma}$  be the approximate posterior covariance derived by the SKI kernel, and  $\theta$  be one of the GP hyperparameters. For any vector  $\mathbf{d}$ , the gradient  $\partial \tilde{\Sigma} \mathbf{d} / \partial \theta$  is given below. Note that during the Lanczos process,  $\mathbf{d}$  is a function of  $\theta$ , which should be properly handled in backpropagation.

$$\begin{aligned}
& \frac{\partial}{\partial \theta} \left\{ \mathbf{W}_x \mathbf{K}_{u,u} \mathbf{W}_x^\top \mathbf{d} - \mathbf{W}_x \mathbf{K}_{u,u} \mathbf{W}_t^\top (\mathbf{W}_t \mathbf{K}_{u,u} \mathbf{W}_t^\top + \rho \mathbf{I})^{-1} \mathbf{W}_t \mathbf{K}_{u,u} \mathbf{W}_x^\top \mathbf{d} \right\} \\
&= \mathbf{W}_x \frac{\partial \mathbf{K}_{u,u}}{\partial \theta} \mathbf{W}_x^\top \mathbf{d} \\
&\quad - \mathbf{W}_x \frac{\partial \mathbf{K}_{u,u}}{\partial \theta} \mathbf{W}_t^\top (\mathbf{W}_t \mathbf{K}_{u,u} \mathbf{W}_t^\top + \rho \mathbf{I})^{-1} \mathbf{W}_t \mathbf{K}_{u,u} \mathbf{W}_x^\top \mathbf{d} \\
&\quad - \mathbf{W}_x \mathbf{K}_{u,u} \mathbf{W}_t^\top (\mathbf{W}_t \mathbf{K}_{u,u} \mathbf{W}_t^\top + \rho \mathbf{I})^{-1} \mathbf{W}_t \frac{\partial \mathbf{K}_{u,u}}{\partial \theta} \mathbf{W}_x^\top \mathbf{d} \\
&\quad + \mathbf{W}_x \mathbf{K}_{u,u} \mathbf{W}_t^\top (\mathbf{W}_t \mathbf{K}_{u,u} \mathbf{W}_t^\top + \rho \mathbf{I})^{-1} \mathbf{W}_t \frac{\partial \mathbf{K}_{u,u}}{\partial \theta} \mathbf{W}_t^\top \\
&\quad \quad (\mathbf{W}_t \mathbf{K}_{u,u} \mathbf{W}_t^\top + \rho \mathbf{I})^{-1} \mathbf{W}_t \mathbf{K}_{u,u} \mathbf{W}_x^\top \mathbf{d}.
\end{aligned}$$

To reduce redundant computations, we introduce the following variables:

$$\begin{aligned}
\alpha &= \mathbf{W}_x^\top \mathbf{d}, \\
\beta &= \frac{\partial \mathbf{K}_{u,u}}{\partial \theta} \alpha, \\
\gamma &= \mathbf{K}_{u,u} \alpha, \\
\delta &= (\mathbf{W}_t \mathbf{K}_{u,u} \mathbf{W}_t^\top + \rho \mathbf{I})^{-1} \mathbf{W}_t \gamma, \\
\zeta &= \frac{\partial \mathbf{K}_{u,u}}{\partial \theta} \mathbf{W}_t^\top \delta, \\
\eta &= \mathbf{K}_{u,u} \mathbf{W}_t^\top (\mathbf{W}_t \mathbf{K}_{u,u} \mathbf{W}_t^\top + \rho \mathbf{I})^{-1} \mathbf{W}_t (\zeta - \beta).
\end{aligned}$$

The gradient with respect to  $\theta$  is therefore  $\partial \tilde{\Sigma} \mathbf{d} / \partial \theta = \mathbf{W}_x (\beta - \zeta + \eta)$ .

The gradient  $\partial \tilde{\Sigma} \mathbf{d} / \partial \rho$  with respect to the noise variance  $\rho$  is given by

$$\begin{aligned}
& \frac{\partial}{\partial \rho} \left\{ \mathbf{W}_x \mathbf{K}_{u,u} \mathbf{W}_x^\top - \mathbf{W}_x \mathbf{K}_{u,u} \mathbf{W}_t^\top (\mathbf{W}_t \mathbf{K}_{u,u} \mathbf{W}_t^\top + \rho \mathbf{I})^{-1} \mathbf{W}_t \mathbf{K}_{u,u} \mathbf{W}_x^\top \right\} \\
&= \mathbf{W}_x \mathbf{K}_{u,u} \mathbf{W}_t^\top (\mathbf{W}_t \mathbf{K}_{u,u} \mathbf{W}_t^\top + \rho \mathbf{I})^{-1} (\mathbf{W}_t \mathbf{K}_{u,u} \mathbf{W}_t^\top + \rho \mathbf{I})^{-1} \mathbf{W}_t \mathbf{K}_{u,u} \mathbf{W}_x^\top \mathbf{d} \\
&= \mathbf{W}_x \mathbf{K}_{u,u} \mathbf{W}_t^\top (\mathbf{W}_t \mathbf{K}_{u,u} \mathbf{W}_t^\top + \rho \mathbf{I})^{-1} \delta.
\end{aligned}$$

## A.2 Gradients of the approximate posterior GP mean

Let  $\tilde{\boldsymbol{\mu}}$  denote the approximate posterior mean derived by the SKI kernel. The gradient  $\partial\tilde{\boldsymbol{\mu}}/\partial\theta$  with respect to the GP hyperparameter  $\theta$  is given by

$$\begin{aligned} & \frac{\partial}{\partial\theta} \mathbf{W}_x \mathbf{K}_{u,u} \mathbf{W}_t^\top (\mathbf{W}_t \mathbf{K}_{u,u} \mathbf{W}_t^\top + \rho \mathbf{I})^{-1} \mathbf{v} \\ &= \mathbf{W}_x \frac{\partial \mathbf{K}_{u,u}}{\partial\theta} \mathbf{W}_t^\top (\mathbf{W}_t \mathbf{K}_{u,u} \mathbf{W}_t^\top + \rho \mathbf{I})^{-1} \mathbf{v} \\ & \quad - \mathbf{W}_x \mathbf{K}_{u,u} \mathbf{W}_t^\top (\mathbf{W}_t \mathbf{K}_{u,u} \mathbf{W}_t^\top + \rho \mathbf{I})^{-1} \mathbf{W}_t \frac{\partial \mathbf{K}_{u,u}}{\partial\theta} \mathbf{W}_t^\top (\mathbf{W}_t \mathbf{K}_{u,u} \mathbf{W}_t^\top + \rho \mathbf{I})^{-1} \mathbf{v}. \end{aligned}$$

To reduce redundant computations, we introduce the following variables:

$$\begin{aligned} \boldsymbol{\alpha} &= (\mathbf{W}_t \mathbf{K}_{u,u} \mathbf{W}_t^\top + \rho \mathbf{I})^{-1} \mathbf{v}, \\ \boldsymbol{\beta} &= \frac{\partial \mathbf{K}_{u,u}}{\partial\theta} \mathbf{W}_t^\top \boldsymbol{\alpha}, \\ \boldsymbol{\gamma} &= \mathbf{K}_{u,u} \mathbf{W}_t^\top (\mathbf{W}_t \mathbf{K}_{u,u} \mathbf{W}_t^\top + \rho \mathbf{I})^{-1} \mathbf{W}_t \boldsymbol{\beta}. \end{aligned}$$

The gradient with respect to  $\theta$  is therefore  $\partial\tilde{\boldsymbol{\mu}}/\partial\theta = \mathbf{W}_x (\boldsymbol{\beta} - \boldsymbol{\gamma})$ .

The gradient  $\partial\tilde{\boldsymbol{\mu}}/\partial\rho$  with respect to the noise variance  $\rho$  is given by

$$\begin{aligned} & \frac{\partial}{\partial\rho} \mathbf{W}_x \mathbf{K}_{u,u} \mathbf{W}_t^\top (\mathbf{W}_t \mathbf{K}_{u,u} \mathbf{W}_t^\top + \rho \mathbf{I})^{-1} \mathbf{v} \\ &= -\mathbf{W}_x \mathbf{K}_{u,u} \mathbf{W}_t^\top (\mathbf{W}_t \mathbf{K}_{u,u} \mathbf{W}_t^\top + \rho \mathbf{I})^{-1} (\mathbf{W}_t \mathbf{K}_{u,u} \mathbf{W}_t^\top + \rho \mathbf{I})^{-1} \mathbf{v} \\ &= -\mathbf{W}_x \mathbf{K}_{u,u} \mathbf{W}_t^\top (\mathbf{W}_t \mathbf{K}_{u,u} \mathbf{W}_t^\top + \rho \mathbf{I})^{-1} \boldsymbol{\alpha}. \end{aligned}$$

## B Cubic interpolation in backpropagation

The choice of cubic convolution interpolation proposed by Keys [1] is preferable over other interpolation methods such as spline interpolation when training the GP parameters. If spline interpolation is used to construct the SKI kernel  $\tilde{\mathbf{K}}_{a,b}$ , the interpolation matrix  $\mathbf{W}_a$  depends not only on  $\mathbf{a}$  and  $\mathbf{u}$  but also on the kernel  $\mathbf{K}_{u,u}$ , which depends on the GP parameters  $\boldsymbol{\theta}$ . As a result, the gradient  $\partial\mathbf{W}_a/\partial\boldsymbol{\theta}$  needs to be computed and thus introduces a huge overhead in backpropagation. On the other hand, the interpolation matrix based on the cubic convolution interpolation depends only on  $\mathbf{a}$  and  $\mathbf{u}$ , which are fixed once the data are given. Therefore, with cubic convolution interpolation, both  $\mathbf{W}_a$  and  $\mathbf{W}_b$  are constant matrices throughout the entire training process.

## C Architectures used in the experiment

The architecture of each classifier compared in Section 7.2 are described as follows. The fully-connected network consists of two fully-connected layers, each of which contains 256 units. The convolutional network contains a total of five layers: the first and the third layer are both one-dimensional convolutional layers with four filters of size 5. The second and the fourth layer are one-dimensional max-pooling layers of size 2. The last layer is a fully-connected layer with 256 units. We apply rectified linear activation to all of the convolutional and fully-connected layers. Each classifier takes  $d = 254$  input features produced by the GP adapter.

## References

- [1] Robert G Keys. Cubic convolution interpolation for digital image processing. *Acoustics, Speech and Signal Processing, IEEE Transactions on*, 29(6):1153–1160, 1981.
